# Supplementary material for: Cost–Benefit Analysis of Monitoring Insect Pests and Aerial Spraying of Insecticides: The Case of Protecting Pine Forests against Dendrolimus pini in Brandenburg (Germany)
Source: MDPI journal article supplement (doi:10.3390/f15010104), 2024-01-04
Supplement: s1 [file s1]

Archive with 1 entries (1 files):
- forests-2784563-supplementary.pdf
