# Supplementary material for: Cost–Benefit Analysis of Monitoring Insect Pests and Aerial Spraying of Insecticides: The Case of Protecting Pine Forests against Dendrolimus pini in Brandenburg (Germany)
Source: MDPI journal article supplement (doi:10.3390/f15010104), 2024-01-04
Supplement: s1 [file s1 › forests-2784563-supplementary.pdf]

**Supplementary materials for Maaß and Kehlenbeck (2024). Cost–Benefit Analysis of Monitoring Insect Pests and Aerial Spraying of Insecticides: The Case of Protecting Pine Forests against *Dendrolimus pini* in Brandenburg (Germany).**

**S1: Questionnaires for collecting information on the costs of monitoring insect pests and aerial spraying of insecticides.**

| Questionnaire I |                                                       |
|-----------------|-------------------------------------------------------|
| Topic:          | Costs of monitoring <i>Dendrolimus pini</i> L.        |
| Study area:     | Cottbus forest district and Lieberose forest district |
| Study year:     | 2014                                                  |

Please refer all your information exclusively to the study area and study year indicated above.

### 1. Area Monitored

Please indicate,

- (1) the total area monitored for *D. pini* in the study area and study year during winter (basic monitoring),
- (2) the total area monitored for *D. pini* in the study area and study year during spring (advanced monitoring).

|                         | Total area<br>(ha) |
|-------------------------|--------------------|
| (1) Basic monitoring    |                    |
| (2) Advanced monitoring |                    |

### 2. Costs of Materials

Please indicate for the basic and advanced monitoring of *D. pini*,

- (1) what materials were used in the study area and study year,
- (2) how much of the materials was used in total,
- (3) what costs accrued per unit of material.

| (1) Material (basic monitoring) | (2) Quantity<br>(unit) | (3) Costs per unit<br>(EUR/unit) |
|---------------------------------|------------------------|----------------------------------|
|                                 |                        |                                  |
|                                 |                        |                                  |
|                                 |                        |                                  |
|                                 |                        |                                  |

| (1) Material (advanced monitoring) | (2) Quantity<br>(unit) | (3) Costs per unit<br>(EUR/unit) |
|------------------------------------|------------------------|----------------------------------|
|                                    |                        |                                  |
|                                    |                        |                                  |
|                                    |                        |                                  |
|                                    |                        |                                  |

### 3. Costs of Labor

Please indicate for the basic and advanced monitoring of *D. pini*,

- (1) what work steps were carried out to monitor *D. pini* in the study area and study year,
- (2) which workers carried out the steps,
- (3) how many hours were needed in total by the workers to perform the steps,
- (4) what costs (i.e., gross wage) accrued per hour worked.

| (1) Work steps<br>(basic monitoring) | (2) Workers <sup>1)</sup> | (3) Total hours worked<br>(h) | (4) Costs per hour<br>(EUR/h) |
|--------------------------------------|---------------------------|-------------------------------|-------------------------------|
|                                      |                           |                               |                               |
|                                      |                           |                               |                               |
|                                      |                           |                               |                               |
|                                      |                           |                               |                               |

<sup>1)</sup> Workers: e.g., head of the forest district, forest ranger, office worker, forest worker.

| (1) Work steps<br>(advanced monitoring) | (2) Workers <sup>1)</sup> | (3) Total hours worked<br>(h) | (4) Costs per hour<br>(EUR/h) |
|-----------------------------------------|---------------------------|-------------------------------|-------------------------------|
|                                         |                           |                               |                               |
|                                         |                           |                               |                               |
|                                         |                           |                               |                               |
|                                         |                           |                               |                               |

<sup>1)</sup> Workers: e.g., head of the forest district, forest ranger, office worker, forest worker.

### 4. Costs of Car Use

Please indicate for the basic and advanced monitoring of *D. pini*,

- (1) what work steps included the use of cars in the study area and study year,
- (2) how many kilometers were driven by car to carry out the work steps,
- (3) what costs accrued per kilometer driven.

| (1) Work steps with car use (basic monitoring) | (2) Kilometers driven<br>(km) | (3) Costs per kilometer<br>(EUR/km) |
|------------------------------------------------|-------------------------------|-------------------------------------|
|                                                |                               |                                     |
|                                                |                               |                                     |
|                                                |                               |                                     |
|                                                |                               |                                     |

| (1) Work steps with car use (advanced monitoring) | (2) Kilometers driven<br>(km) | (3) Costs per kilometer<br>(EUR/km) |
|---------------------------------------------------|-------------------------------|-------------------------------------|
|                                                   |                               |                                     |
|                                                   |                               |                                     |
|                                                   |                               |                                     |
|                                                   |                               |                                     |

## 5. Other Costs

Please indicate what other costs accrued for the basic and advanced monitoring of *D. pini* in the study area and study year.

| Other costs (basic monitoring) | Total costs<br>(EUR) |
|--------------------------------|----------------------|
|                                |                      |
|                                |                      |
|                                |                      |
|                                |                      |

| Other costs (advanced monitoring) | Total costs<br>(EUR) |
|-----------------------------------|----------------------|
|                                   |                      |
|                                   |                      |
|                                   |                      |
|                                   |                      |

| Questionnaire II |                                                                             |
|------------------|-----------------------------------------------------------------------------|
| Topic:           | Costs of aerial spraying of insecticides against <i>Dendrolimus pini</i> L. |
| Study area:      | Cottbus forest district and Lieberose forest district                       |
| Study year:      | 2014                                                                        |

Please refer all information exclusively to the study area and study year indicated above.

### 1. Forest Area Sprayed with Insecticides

Please indicate,

- (1) the total area forested with Scots pine (*Pinus sylvestris* L.) in the study area and study year,
- (2) the total area predicted to be totally defoliated by caterpillars of *D. pini* in the study area and study year,
- (3) the total area actually treated with insecticides in the study area and study year.

|                                             | Cottbus forest district<br>(ha) | Lieberose forest district<br>(ha) |
|---------------------------------------------|---------------------------------|-----------------------------------|
| (1) Total area forested with Scots pine     |                                 |                                   |
| (2) Total area at risk of total defoliation |                                 |                                   |
| (3) Total area treated with insecticides    |                                 |                                   |

### 2. Technical Information

Please indicate,

- (1) the technique used for the aerial spraying of insecticides in the study area and study year,
- (2) the date of the spraying,
- (3) the trade name of the insecticide sprayed,
- (4) the active substance of the insecticide,
- (5) the application rate of the insecticide per hectare,
- (6) the volume of water sprayed per hectare.

|                                                                  | Cottbus forest district | Lieberose forest district |
|------------------------------------------------------------------|-------------------------|---------------------------|
| (1) Technique used for the spraying                              |                         |                           |
| (2) Date of the spraying                                         |                         |                           |
| (3) Trade name of the insecticide                                |                         |                           |
| (4) Active substance                                             |                         |                           |
| (5) Application rate (mL ha <sup>-1</sup> ; g ha <sup>-1</sup> ) |                         |                           |
| (6) Spray volume of water (L ha <sup>-1</sup> )                  |                         |                           |

### 3. Costs of Helicopter Services, Insecticides and Water

Please indicate,

- (1) what costs accrued in total for helicopter services (without costs of insecticides and water) in the study area and study year,
- (2) what costs accrued in total for the insecticides used,
- (3) what costs accrued in total for the water used.

|                                        | Cottbus forest district<br>(EUR) | Lieberose forest district<br>(EUR) |
|----------------------------------------|----------------------------------|------------------------------------|
| (1) Total costs of helicopter services |                                  |                                    |
| (2) Total costs of insecticides        |                                  |                                    |
| (3) Total costs of water               |                                  |                                    |

### 4. Costs of Materials

Please indicate,

- (1) what materials were used to prepare, to conduct and to follow up the aerial spraying of insecticides in the study area and study year,
- (2) how much of the materials was used in total,
- (3) what costs accrued per unit of material.

| (1) Material | (2) Quantity<br>(unit) | (3) Costs per unit<br>(EUR/unit) |
|--------------|------------------------|----------------------------------|
|              |                        |                                  |
|              |                        |                                  |
|              |                        |                                  |
|              |                        |                                  |

### 5. Costs of Labor

Please indicate,

- (1) what work steps were carried out to prepare, to conduct and to follow up the aerial spraying of insecticides in the study area and study year,
- (2) which workers carried out the steps,
- (3) how many hours were needed in total by the workers to perform the steps,
- (4) what costs (i.e., gross wage) accrued per hour worked.

| (1) Work steps | (2) Workers <sup>1)</sup> | (3) Total hours worked<br>(h) | (4) Costs per hour<br>(EUR/h) |
|----------------|---------------------------|-------------------------------|-------------------------------|
|                |                           |                               |                               |
|                |                           |                               |                               |
|                |                           |                               |                               |
|                |                           |                               |                               |

<sup>1)</sup> Workers: e.g., head of the forest district, forest ranger, office worker, forest worker.

## 6. Costs of Car Use

Please indicate,

- (1) which work steps included the use of cars in the study area and study year,
- (2) how many kilometers were driven by car to carry out the work steps,
- (3) what costs accrued per kilometer driven.

| (1) Work steps with car use | (2) Kilometers driven<br>(km) | (3) Costs per kilometer<br>(EUR/km) |
|-----------------------------|-------------------------------|-------------------------------------|
|                             |                               |                                     |
|                             |                               |                                     |
|                             |                               |                                     |
|                             |                               |                                     |

## 7. Other Costs

Please indicate what other costs accrued for the spraying of insecticides in the study area and study year.

| Other costs | Total costs<br>(EUR) |
|-------------|----------------------|
|             |                      |
|             |                      |
|             |                      |
|             |                      |

## S2: Guidelines for Expert Interviews.

| Interview Guideline I                            |
|--------------------------------------------------|
| Monitoring of Forest Insect Pests in Brandenburg |

### 1 Introduction

---

- What is your professional background?
- What is your current field of activity and the field of activity of your organization?
- What personal experiences do you have with monitoring of insect pests?
- What aims do you and your organization pursue regarding the monitoring of insect pests?

### 2 Damages through Insect Pests

---

- What role do insect pests like *D. pini* play in pine production in Brandenburg?
- What damages do insect pests like *D. pini* cause in pine production?
- What costs can arise from insect pests in pine production?

### 3 Rules

---

- What rules apply for the monitoring of insect pests in Brandenburg?

### 4 Actors

---

- Which actors participate in the monitoring of insect pests in Brandenburg?
- What are the responsibilities of the actors?

### 5 Monitoring

---

- What is the aim of monitoring insect pests in Brandenburg?
- How is *D. pini* monitored in Brandenburg?
- What work steps are carried out to monitor *D. pini*?

### 6 Benefits

---

- What are the general benefits of monitoring insect pests like *D. pini*?
- What were the benefits of monitoring *D. pini* in the studied case?
- Which actors benefited from monitoring *D. pini* in the studied case?

### 7 Costs

---

- What are the general costs of monitoring of insect pests like *D. pini*?
- What were the costs of monitoring *D. pini* in the studied case?
- Which actors bore the costs in the studied case?

| Interview Guideline II                         |
|------------------------------------------------|
| Aerial Spraying of Insecticides in Brandenburg |

## 1 Introduction

---

- What is your professional background?
- What is your current field of activity and the field of activity of your organization?
- What personal experiences do you have with aerial spraying of insecticides in forests?
- What aims do you and your organization pursue regarding the aerial spraying of insecticides in forests?

## 2 Stand and Site Characteristics

---

- What properties characterize the pine stands in Brandenburg?
- What properties characterize the climate in Brandenburg?
- What properties characterize the soils in Brandenburg?
- How do the characteristics facilitate mass propagations of insect pests?

## 3 Damages through Insect Pests

---

- What role do insect pests like *D. pini* play in pine production in Brandenburg?
- What damages do insect pests like *D. pini* cause in pine production?
- What costs can arise from insect pests in pine production?

## 4 Rules

---

- What rules apply for aerial spraying of insecticides in Brandenburg?
- What rules had to be followed in the studied case of spraying insecticides?

## 5 Actors

---

- Which actors participate in aerial spraying of insecticides in Brandenburg?
- What are the responsibilities of the actors?
- Which actors participated in the spraying of insecticides in the studied case?

## 6 Aerial Spraying of Insecticides

---

- What are the advantages of aerial spraying of insecticides via helicopter?
- What are the disadvantages of aerial spraying of insecticides via helicopter?
- What role does aerial spraying of insecticides play in the control of insect pests in Brandenburg?
- What is the aim of aerial spraying of insecticides in Brandenburg?
- What work steps are carried out to prepare, to conduct and to follow up aerial spraying of insecticides?
- How did you prepare, conduct and follow up the spraying of insecticides in the studied case?

## 7      **Benefits**

---

- What are the general benefits of aerial spraying of insecticides?
- What were the benefits of aerial spraying of insecticides in the studied case?
- Which actors benefited from the aerial spraying of insecticides in the studied case?

## 8      **Costs**

---

- What are the general costs of aerial spraying of insecticides?
- What were the costs of aerial spraying of insecticides in the studied case?
- Which actors bore the costs in the studied case?

**Table S1.** Age constants for evaluating the monetary value of pine stands in Germany [64].

| Age | Age Constant | Age | Age Constant | Age | Age Constant |
|-----|--------------|-----|--------------|-----|--------------|
| 0   | 0            | 41  | 0.427        | 81  | 0.795        |
| 1   | 0.008        | 42  | 0.439        | 82  | 0.801        |
| 2   | 0.015        | 43  | 0.451        | 83  | 0.808        |
| 3   | 0.023        | 44  | 0.462        | 84  | 0.814        |
| 4   | 0.031        | 45  | 0.474        | 85  | 0.820        |
| 5   | 0.040        | 46  | 0.485        | 86  | 0.826        |
| 6   | 0.048        | 47  | 0.496        | 87  | 0.833        |
| 7   | 0.056        | 48  | 0.507        | 88  | 0.839        |
| 8   | 0.065        | 49  | 0.518        | 89  | 0.845        |
| 9   | 0.074        | 50  | 0.529        | 90  | 0.850        |
| 10  | 0.083        | 51  | 0.540        | 91  | 0.856        |
| 11  | 0.092        | 52  | 0.550        | 92  | 0.862        |
| 12  | 0.102        | 53  | 0.561        | 93  | 0.868        |
| 13  | 0.111        | 54  | 0.571        | 94  | 0.873        |
| 14  | 0.121        | 55  | 0.581        | 95  | 0.879        |
| 15  | 0.131        | 56  | 0.591        | 96  | 0.884        |
| 16  | 0.141        | 57  | 0.601        | 97  | 0.890        |
| 17  | 0.151        | 58  | 0.611        | 98  | 0.895        |
| 18  | 0.162        | 59  | 0.621        | 99  | 0.901        |
| 19  | 0.172        | 60  | 0.630        | 100 | 0.906        |
| 20  | 0.183        | 61  | 0.639        | 101 | 0.911        |
| 21  | 0.194        | 62  | 0.648        | 102 | 0.916        |
| 22  | 0.205        | 63  | 0.657        | 103 | 0.921        |
| 23  | 0.216        | 64  | 0.666        | 104 | 0.926        |
| 24  | 0.227        | 65  | 0.675        | 105 | 0.931        |
| 25  | 0.238        | 66  | 0.683        | 106 | 0.936        |
| 26  | 0.250        | 67  | 0.692        | 107 | 0.940        |
| 27  | 0.261        | 68  | 0.700        | 108 | 0.945        |
| 28  | 0.273        | 69  | 0.708        | 109 | 0.950        |
| 29  | 0.285        | 70  | 0.716        | 110 | 0.954        |
| 30  | 0.297        | 71  | 0.723        | 111 | 0.959        |
| 31  | 0.308        | 72  | 0.731        | 112 | 0.963        |
| 32  | 0.320        | 73  | 0.739        | 113 | 0.968        |
| 33  | 0.332        | 74  | 0.746        | 114 | 0.972        |
| 34  | 0.344        | 75  | 0.753        | 115 | 0.977        |
| 35  | 0.356        | 76  | 0.760        | 116 | 0.981        |
| 36  | 0.368        | 77  | 0.767        | 117 | 0.986        |
| 37  | 0.380        | 78  | 0.774        | 118 | 0.990        |
| 38  | 0.392        | 79  | 0.781        | 119 | 0.995        |
| 39  | 0.404        | 80  | 0.788        | 120 | 1.000        |
| 40  | 0.415        |     |              |     |              |

**Table S2.** Harvesting costs and timber prices of Scots pine for different site indices in Brandenburg (based on MIL [57]\* and interpolation).

| Site Index | Harvesting Costs<br>(EUR m <sup>-3</sup> without bark) | Timber Price<br>(EUR m <sup>-3</sup> without bark) |
|------------|--------------------------------------------------------|----------------------------------------------------|
| < 0.5      | 17.0                                                   | 74.0                                               |
| 0.5        | 17.0*                                                  | 74.0*                                              |
| 0.6        | 17.0                                                   | 73.4                                               |
| 0.7        | 17.0                                                   | 72.8                                               |
| 0.8        | 17.0                                                   | 72.2                                               |
| 0.9        | 17.0                                                   | 71.6                                               |
| 1.0        | 17.0*                                                  | 71.0*                                              |
| 1.1        | 17.0                                                   | 70.6                                               |
| 1.2        | 17.0                                                   | 70.2                                               |
| 1.3        | 17.0                                                   | 69.8                                               |
| 1.4        | 17.0                                                   | 69.4                                               |
| 1.5        | 17.0*                                                  | 69.0*                                              |
| 1.6        | 17.0                                                   | 68.4                                               |
| 1.7        | 17.0                                                   | 67.8                                               |
| 1.8        | 17.0                                                   | 67.2                                               |
| 1.9        | 17.0                                                   | 66.6                                               |
| 2.0        | 17.0*                                                  | 66.0*                                              |
| 2.1        | 17.0                                                   | 65.6                                               |
| 2.2        | 17.0                                                   | 65.2                                               |
| 2.3        | 17.0                                                   | 64.8                                               |
| 2.4        | 17.0                                                   | 64.4                                               |
| 2.5        | 17.0*                                                  | 64.0*                                              |
| 2.6        | 16.8                                                   | 63.4                                               |
| 2.7        | 16.6                                                   | 62.8                                               |
| 2.8        | 16.4                                                   | 62.2                                               |
| 2.9        | 16.2                                                   | 61.6                                               |
| 3.0        | 16.0*                                                  | 61.0*                                              |
| 3.1        | 16.0                                                   | 60.2                                               |
| 3.2        | 16.0                                                   | 59.4                                               |
| 3.3        | 16.0                                                   | 58.6                                               |
| 3.4        | 16.0                                                   | 57.8                                               |
| 3.5        | 16.0*                                                  | 57.0*                                              |
| 3.6        | 16.0                                                   | 56.6                                               |
| 3.7        | 16.0                                                   | 56.2                                               |
| 3.8        | 16.0                                                   | 55.8                                               |
| 3.9        | 16.0                                                   | 55.4                                               |
| 4.0        | 16.0*                                                  | 55.0*                                              |
| > 4.0      | 16.0                                                   | 55.0                                               |

## References

Reference numbers correspond to those in the main text.

57. MIL. *Richtlinie zur Waldbewertung des Landes Brandenburg*; Ministerium für Infrastruktur und Landwirtschaft des Landes Brandenburg: Potsdam, Germany, 2014.
64. BIMA. *Bekanntmachung der Anpassung der Richtlinien für die Ermittlung und Prüfung des Verkehrswerts von Waldflächen und für Nebenentschädigungen (Waldwertermittlungsrichtlinien 2000 – WaldR 2000)*; Bundesanstalt für Immobilienaufgaben: Bonn, Germany, 2019.
